# Supplementary material for: Severe Fever With Thrombocytopenia Syndrome Virus-Induced Macrophage Differentiation Is Regulated by miR-146
Source: Front Immunol. 2019 May 15;10:1095. doi: 10.3389/fimmu.2019.01095 (PMC6529556; doi:10.3389/fimmu.2019.01095)
Supplement: Supplementary Table 1 — The miRNA expression profiles in M1 and M2 macrophage-like THP-1 cells infected by SFTSV. [file Table_1.XLSX]

## Sheet: Sheet1
miRNA	NC2_count	NC2_Normalize	Infection2_count	Infection2_Normalize	FoldChange	log2FoldChange	pval	padj	Up/Down	Significant
hsa-miR-146b-5p	104283	18379.9	705878	130907	7.12232	2.83235	0	0	up	yes
hsa-miR-4645-3p	7	1.23375	22	4.07997	3.30697	1.72551	0.00288493	0.00656835	up	yes
hsa-miR-146a-5p	40773	7186.24	126685	23494.1	3.26932	1.70899	0	0	up	yes
hsa-miR-199b-5p	63	11.1038	190	35.2361	3.17335	1.66601	1.31338e-17	6.03212e-17	up	yes
hsa-miR-7705	17	2.99625	51	9.45811	3.15665	1.65839	1.02714e-05	3.10925e-05	up	yes
hsa-miR-8061	8	1.41	24	4.45088	3.15665	1.65839	0.00247667	0.00573691	up	yes
hsa-miR-2277-5p	5	0.88125	15	2.7818	3.15665	1.65839	0.0167385	0.0335253	up	yes
hsa-miR-17-3p	34	5.9925	101	18.7308	3.1257	1.64418	6.83061e-10	2.6563e-09	up	yes
hsa-miR-362-3p	8	1.41	23	4.26542	3.02512	1.59699	0.0039354	0.00873606	up	yes
hsa-miR-497-5p	9	1.58625	25	4.63633	2.92282	1.54736	0.00330573	0.00746264	up	yes
hsa-miR-9-3p	10	1.7625	27	5.00724	2.84098	1.50639	0.00275917	0.00633619	up	yes
hsa-miR-106a-5p	6	1.0575	16	2.96725	2.80591	1.48847	0.0223738	0.0435037	up	yes
hsa-miR-582-5p	50	8.8125	131	24.2944	2.75681	1.463	1.10452e-10	4.42443e-10	up	yes
hsa-miR-30e-5p	47598	8389.15	120059	22265.3	2.65406	1.4082	0	0	up	yes
hsa-miR-142-3p	12115	2135.27	30289	5617.19	2.63067	1.39543	0	0	up	yes
hsa-miR-7-1-3p	118	20.7975	292	54.1523	2.60379	1.38061	2.94447e-20	1.40064e-19	up	yes
hsa-miR-125a-3p	17	2.99625	40	7.41813	2.4758	1.3079	0.00106026	0.0025676	up	yes
hsa-miR-132-3p	428	75.435	989	183.413	2.43141	1.28179	8.12562e-58	5.69613e-57	up	yes
hsa-miR-1307-5p	2860	504.075	6303	1168.91	2.31892	1.21345	0	0	up	yes
hsa-miR-502-3p	56	9.87	121	22.4398	2.27354	1.18494	1.36306e-07	4.6551e-07	up	yes
hsa-miR-652-5p	19	3.34875	41	7.60358	2.27057	1.18306	0.00218488	0.0051054	up	yes
hsa-miR-34a-5p	101	17.8013	209	38.7597	2.17736	1.12258	3.2858e-11	1.36763e-10	up	yes
hsa-miR-3909	16	2.82	33	6.11996	2.1702	1.11783	0.00862116	0.0179417	up	yes
hsa-miR-7974	80	14.1	157	29.1162	2.06497	1.04612	5.66868e-08	2.00006e-07	up	yes
hsa-miR-4521	20	3.525	39	7.23268	2.05182	1.03691	0.00722613	0.0152772	up	yes
hsa-miR-33a-5p	38	6.6975	74	13.7235	2.04905	1.03496	0.000220294	0.000581018	up	yes
hsa-miR-7849-3p	20	3.525	5	0.927266	0.263054	-1.92657	0.00282171	0.00645199	down	yes
hsa-miR-7704	47	8.28375	11	2.03999	0.246263	-2.02173	2.29196e-06	7.31187e-06	down	yes
hsa-miR-6852-5p	172	30.315	40	7.41813	0.244701	-2.03091	1.22171e-19	5.76005e-19	down	yes
hsa-miR-4435	28	4.935	7	1.29817	0.263054	-1.92657	0.000409784	0.00103962	down	yes
hsa-miR-323b-3p	60	10.575	15	2.7818	0.263054	-1.92657	2.30592e-07	7.72652e-07	down	yes
hsa-miR-766-3p	886	156.158	236	43.767	0.280274	-1.83509	1.80665e-82	1.43661e-81	down	yes
hsa-miR-642a-5p	82	14.4525	24	4.45088	0.307966	-1.69916	2.89249e-08	1.04832e-07	down	yes
hsa-miR-1180-3p	17	2.99625	5	0.927266	0.309475	-1.6921	0.0117816	0.0238663	down	yes
hsa-miR-369-5p	30	5.2875	9	1.66908	0.315665	-1.66353	0.000947635	0.00230534	down	yes
hsa-miR-490-3p	23	4.05375	7	1.29817	0.32024	-1.64278	0.00412327	0.00909163	down	yes
hsa-miR-1306-5p	37	6.52125	12	2.22544	0.341259	-1.55106	0.00048258	0.00120141	down	yes
hsa-miR-654-3p	1222	215.378	402	74.5522	0.346146	-1.53055	8.24802e-88	6.86605e-87	down	yes
hsa-miR-4433b-5p	484	85.305	159	29.4871	0.345666	-1.53255	6.32656e-36	3.83021e-35	down	yes
hsa-miR-6511a-3p	21	3.70125	7	1.29817	0.350739	-1.51153	0.00987868	0.0203994	down	yes
hsa-miR-338-5p	69	12.1613	23	4.26542	0.350739	-1.51153	2.91465e-06	9.13429e-06	down	yes
hsa-miR-4792	106	18.6825	36	6.67632	0.357357	-1.48456	1.06622e-08	4.02869e-08	down	yes
hsa-miR-1908-5p	47	8.28375	16	2.96725	0.358201	-1.48116	0.000143404	0.000384693	down	yes
hsa-miR-655-3p	17	2.99625	6	1.11272	0.37137	-1.42907	0.0259939	0.0492835	down	yes
hsa-miR-376c-3p	49	8.63625	18	3.33816	0.386528	-1.37135	0.000248774	0.000649698	down	yes
hsa-miR-532-3p	231	40.7138	90	16.6908	0.409954	-1.28646	3.65687e-14	1.61013e-13	down	yes
hsa-miR-3614-5p	23	4.05375	9	1.66908	0.411737	-1.28021	0.0172929	0.034506	down	yes
hsa-miR-877-5p	66	11.6325	26	4.82178	0.414509	-1.27052	6.10761e-05	0.00017126	down	yes
hsa-miR-6837-3p	50	8.8125	20	3.70906	0.420887	-1.2485	0.000578132	0.0014326	down	yes
hsa-miR-1296-5p	44	7.755	18	3.33816	0.430452	-1.21608	0.00156448	0.00368807	down	yes
hsa-miR-652-3p	603	106.279	255	47.2906	0.444967	-1.16823	8.2512e-30	4.77823e-29	down	yes
hsa-miR-369-3p	167	29.4338	71	13.1672	0.447349	-1.16053	2.91097e-09	1.12141e-08	down	yes
hsa-miR-744-5p	949	167.261	411	76.2213	0.455702	-1.13384	7.18287e-44	4.6106e-43	down	yes
hsa-miR-1249-3p	285	50.2313	128	23.738	0.472574	-1.08139	2.36645e-13	1.02501e-12	down	yes
hsa-miR-431-5p	95	16.7438	44	8.15994	0.487342	-1.03699	4.36131e-05	0.000123594	down	yes
hsa-miR-487b-3p	118	20.7975	53	9.82902	0.472606	-1.08129	2.43206e-06	7.71263e-06	down	yes
hsa-miR-484	8399	1480.32	3812	706.948	0.477563	-1.06624	0	0	down	yes
